# Supplementary material
Source: PubMed Central journal article supplement (PMC11577936)

## **Antibacterial activity of the structurally novel C-2 amine-substituted analogues based on quinoxaline**

Yuting Liu<sup>a,b</sup>, Pengju Yang<sup>a,b</sup>, Yunyun Zhou<sup>c</sup>, Zhiwen Zhou<sup>a,b,\*</sup>

<sup>a</sup>Third-grade Pharmacological Laboratory on Traditional Chinese Medicine, State Administration of Traditional Chinese Medicine, China Three Gorges University, Yichang, 443002China

<sup>b</sup>Department of Pharmacy, College of Medicine and Health Sciences, China Three Gorges University, Yichang, 443002China

<sup>c</sup>Department of Quality Control, China Resources Sanjiu (Huangshi) Medical & Pharmaceutical Co., Ltd. , Huangshi, China

\*Corresponding author: E-Mail: [zhiwen.zhou@hotmail.com](mailto:zhiwen.zhou@hotmail.com); Tel.: +86-717-6397328 (Z.W. Zhou)

Figure S1. <sup>1</sup>H-NMR, <sup>13</sup>C-NMR and HPLC spectrum of compound 5a

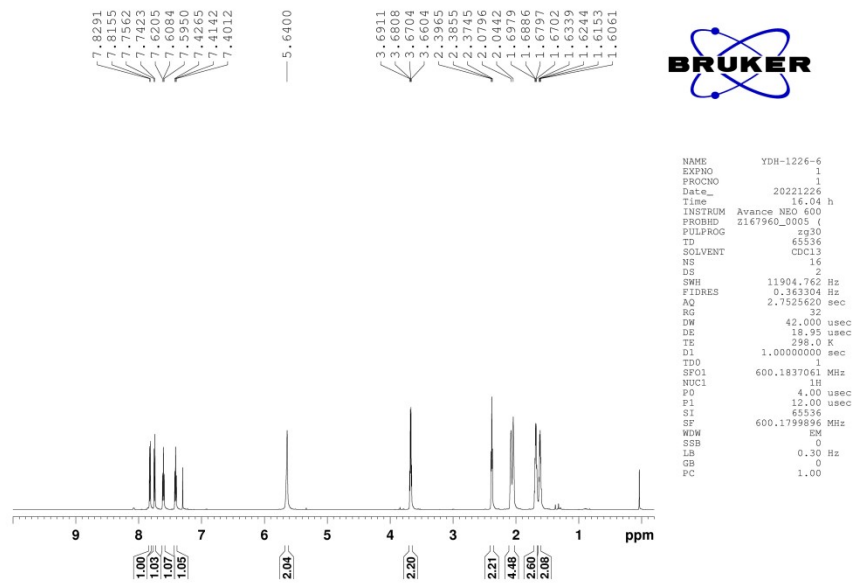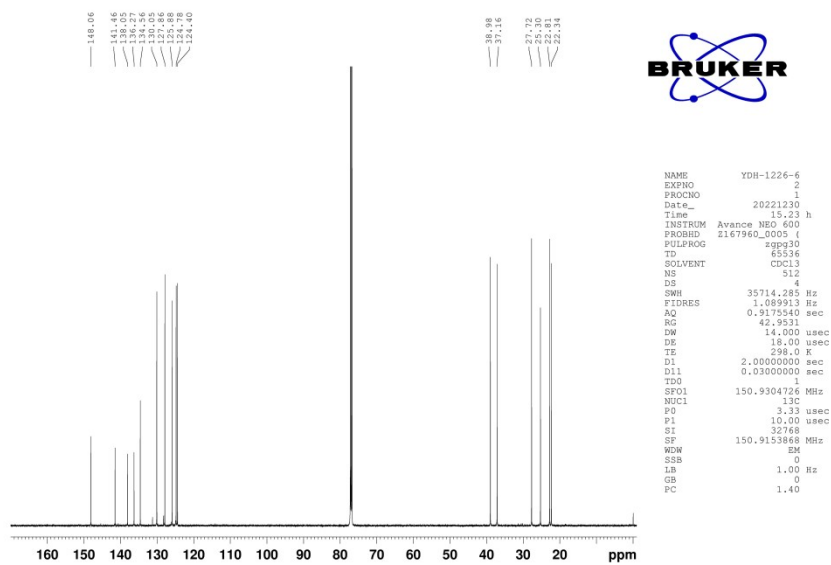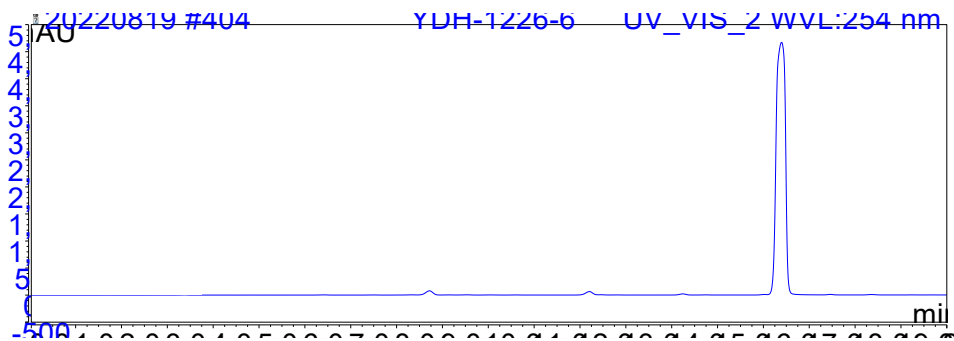

Figure S2. <sup>1</sup>H-NMR, <sup>13</sup>C-NMR and HPLC spectrum of compound 5b

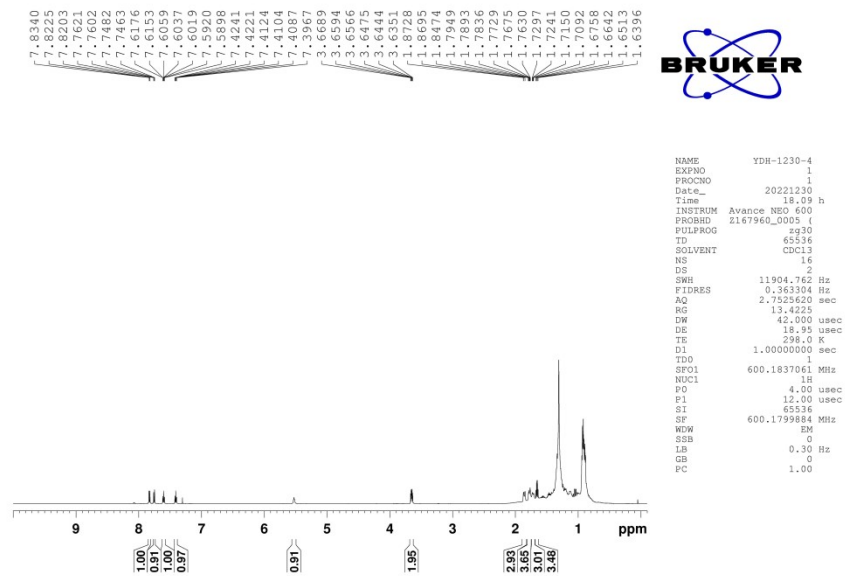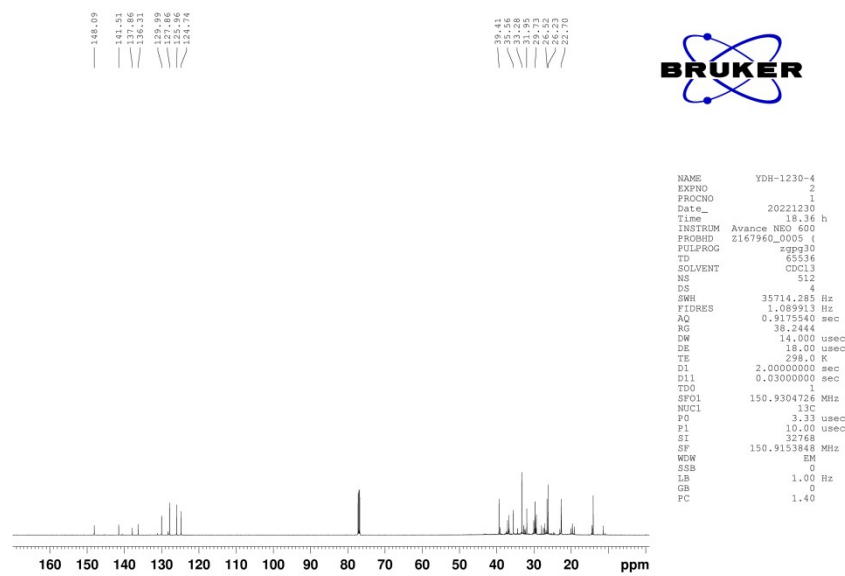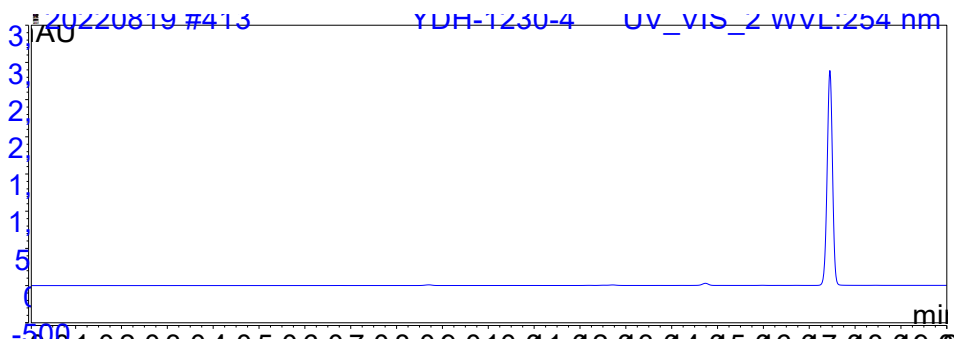

Figure S3. <sup>1</sup>H-NMR of compound 5c

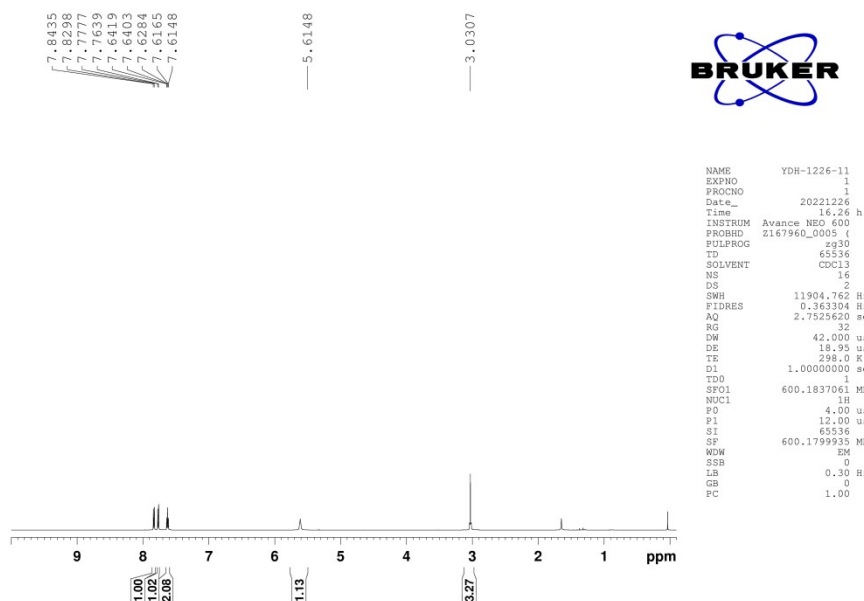

Figure S4. <sup>13</sup>C-NMR spectrum of compound 5d

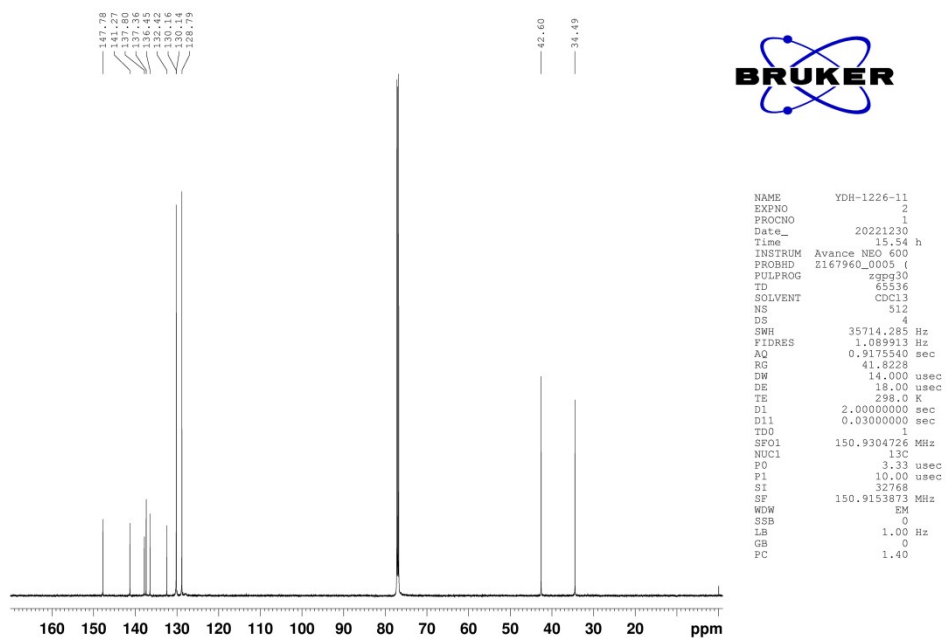

Figure S5. <sup>1</sup>H-NMR, <sup>13</sup>C-NMR and HPLC spectrum of compound 5e

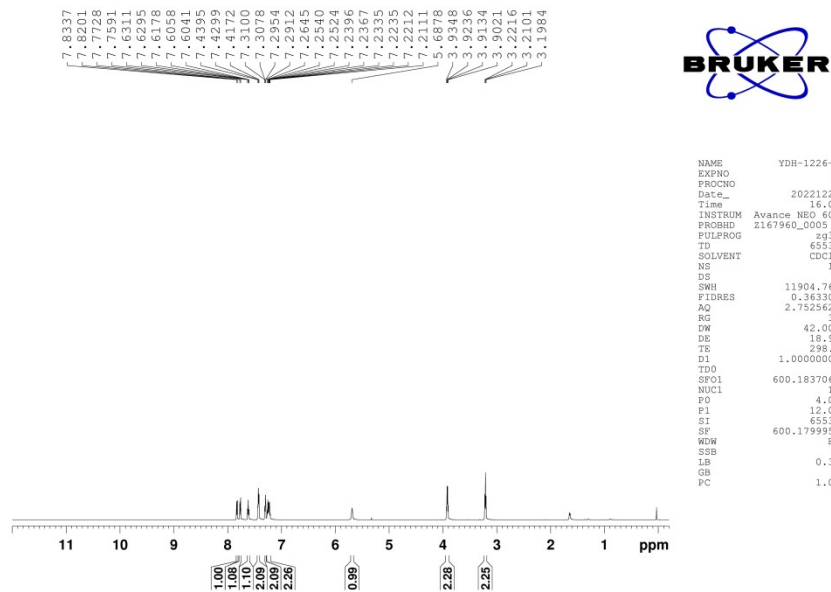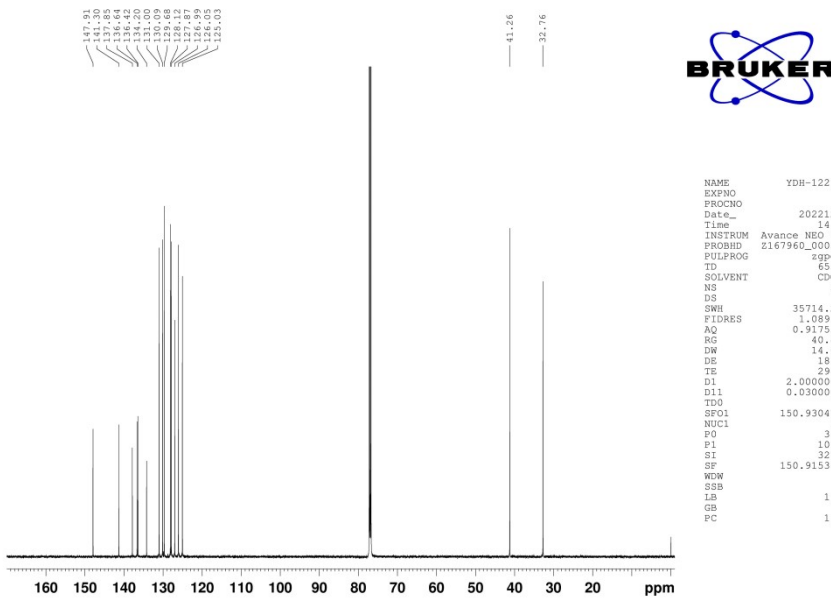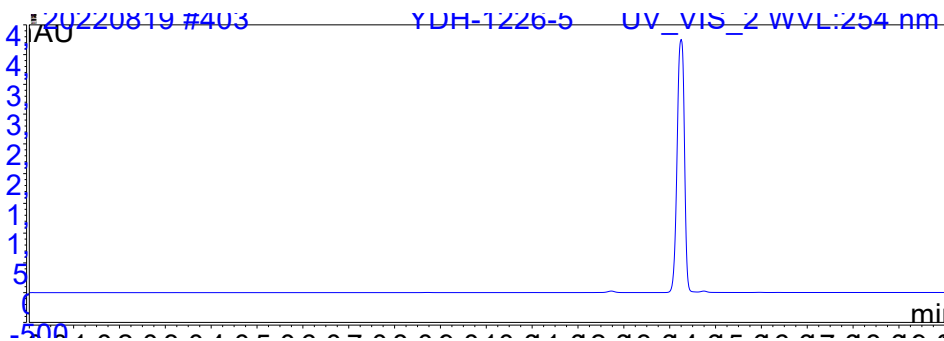

Figure S6. <sup>1</sup>H-NMR, <sup>13</sup>C-NMR and HPLC spectrum of compound 5f

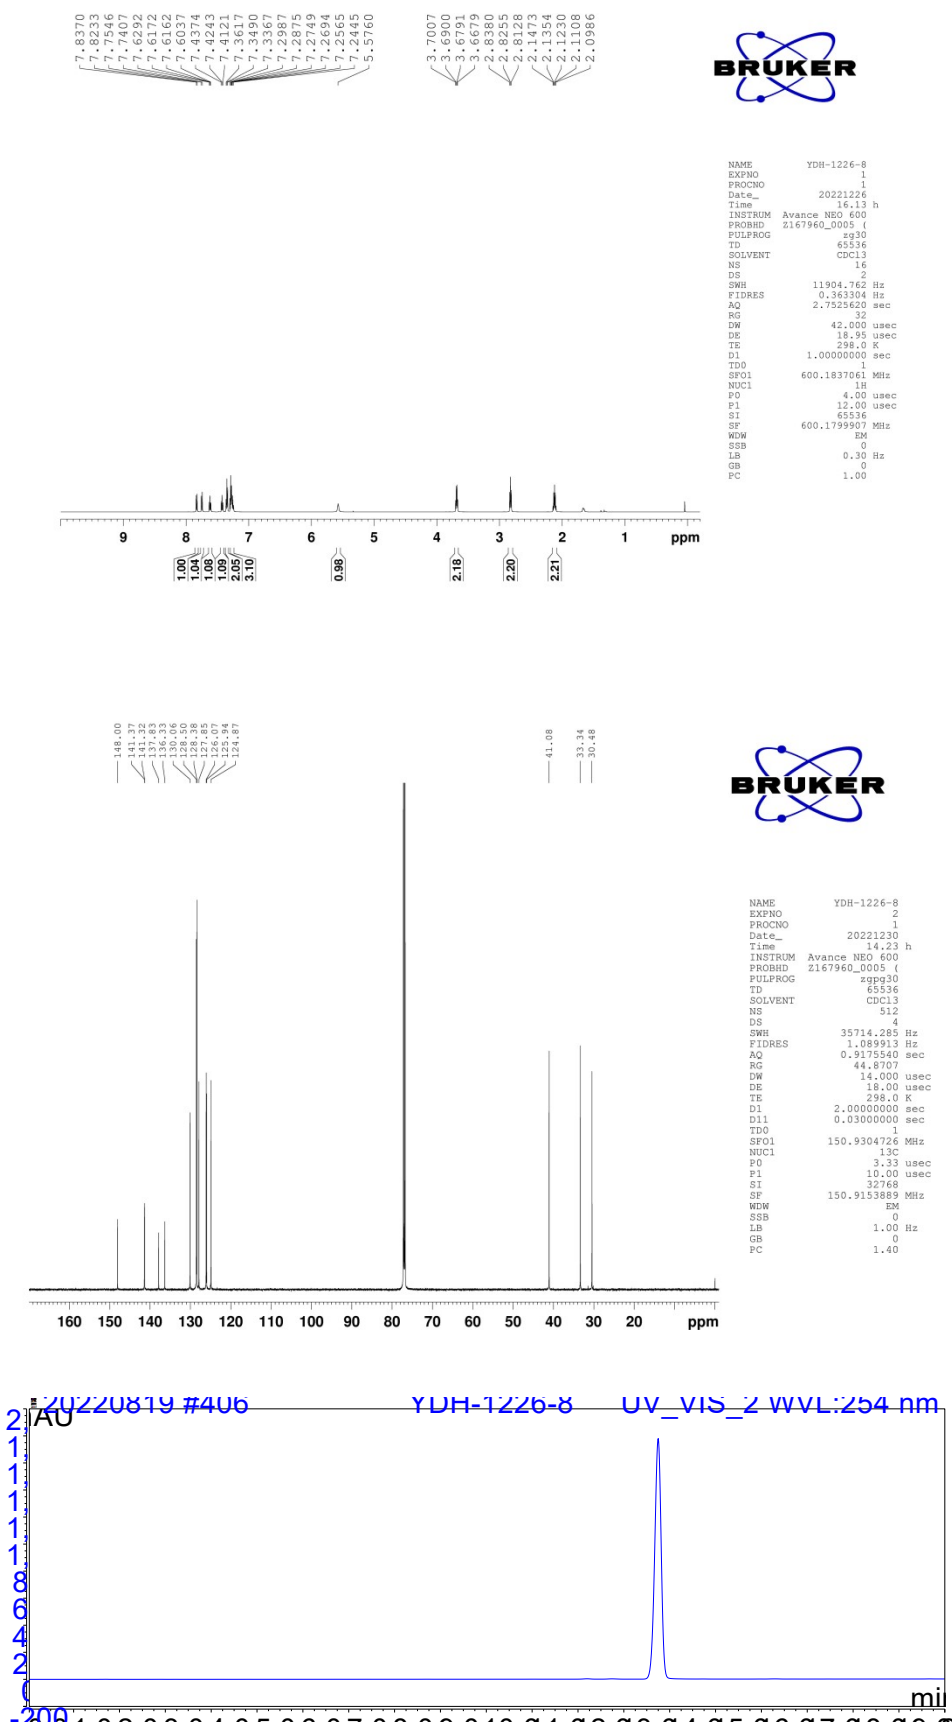

Figure S7. <sup>1</sup>H-NMR, <sup>13</sup>C-NMR and HPLC spectrum of compound 5g

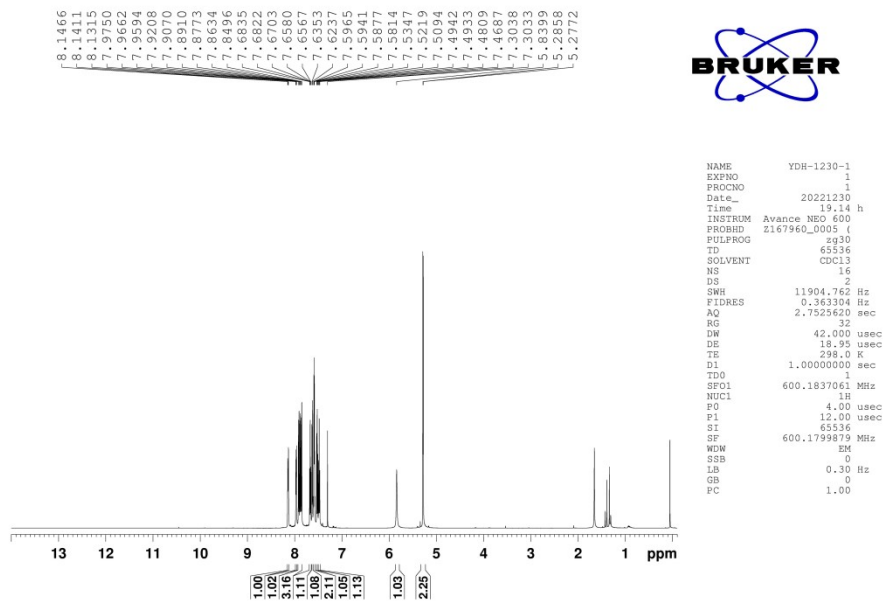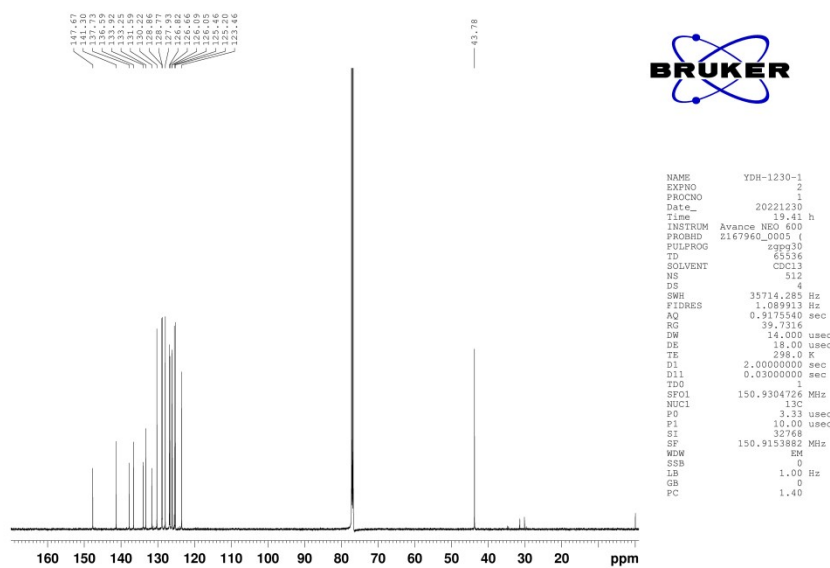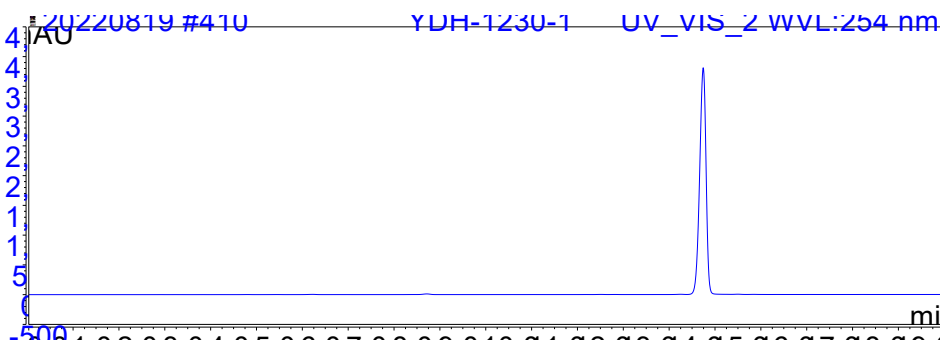

Figure S8. <sup>1</sup>H-NMR, <sup>13</sup>C-NMR and HPLC spectrum of compound 5h

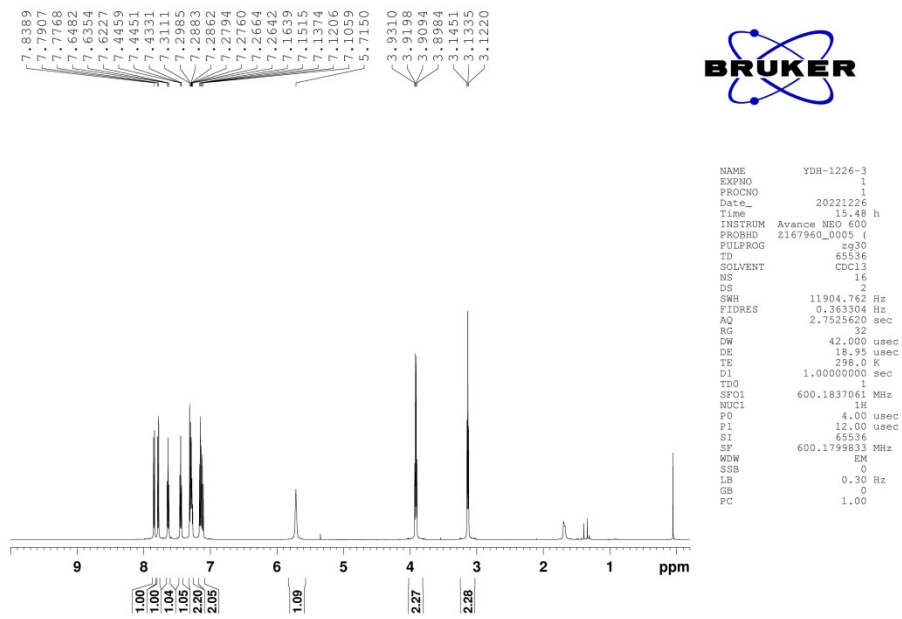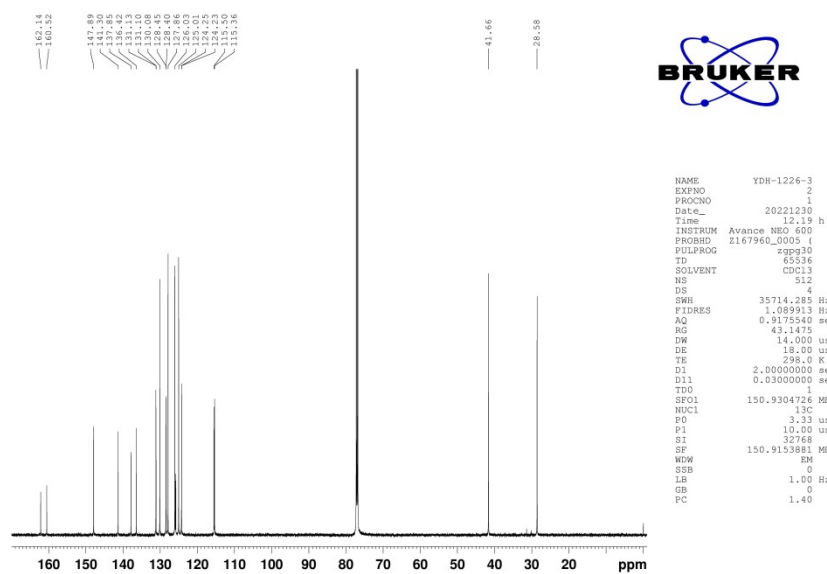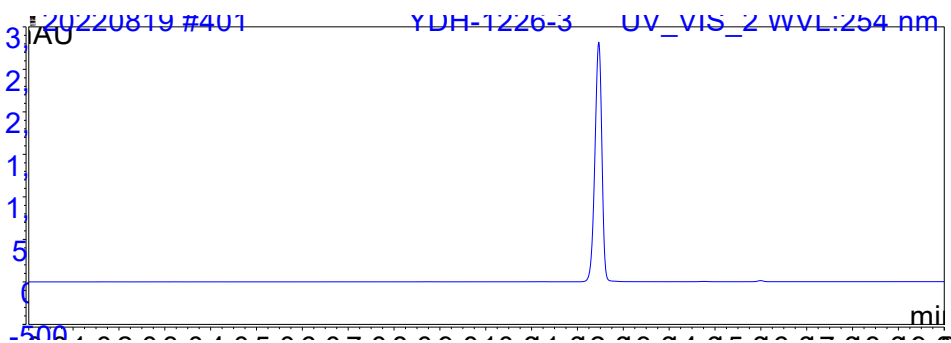



Figure S9. <sup>1</sup>H-NMR, <sup>13</sup>C-NMR and HPLC spectrum of compound 5i

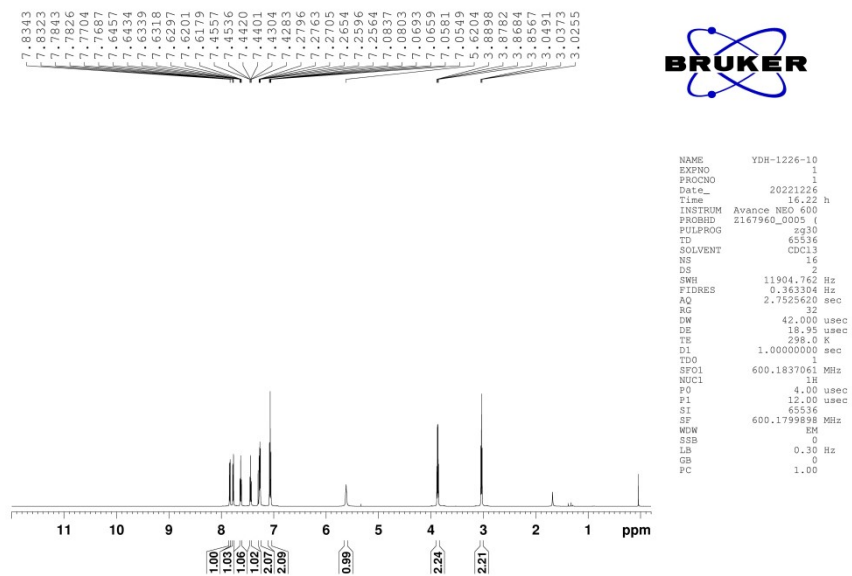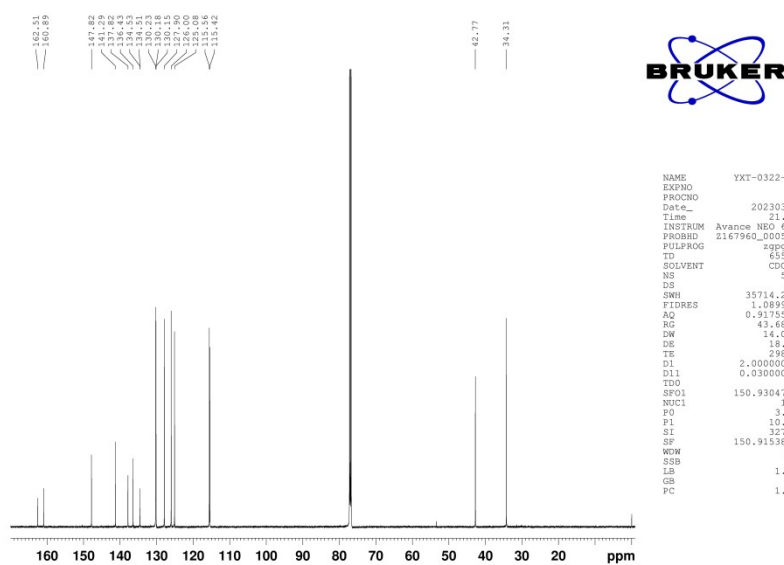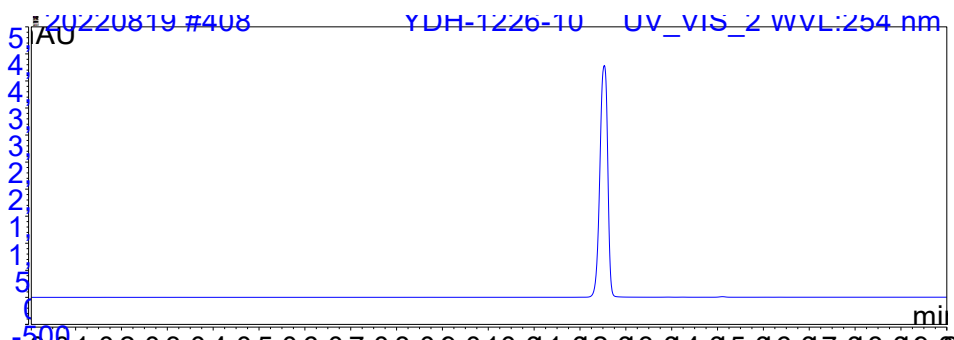

Figure S10. <sup>1</sup>H-NMR, <sup>13</sup>C-NMR and HPLC spectrum of compound 5j

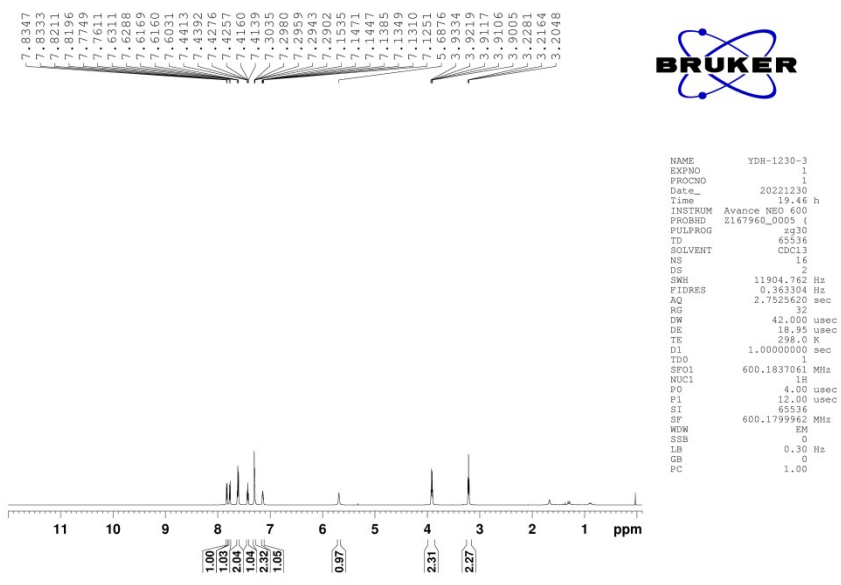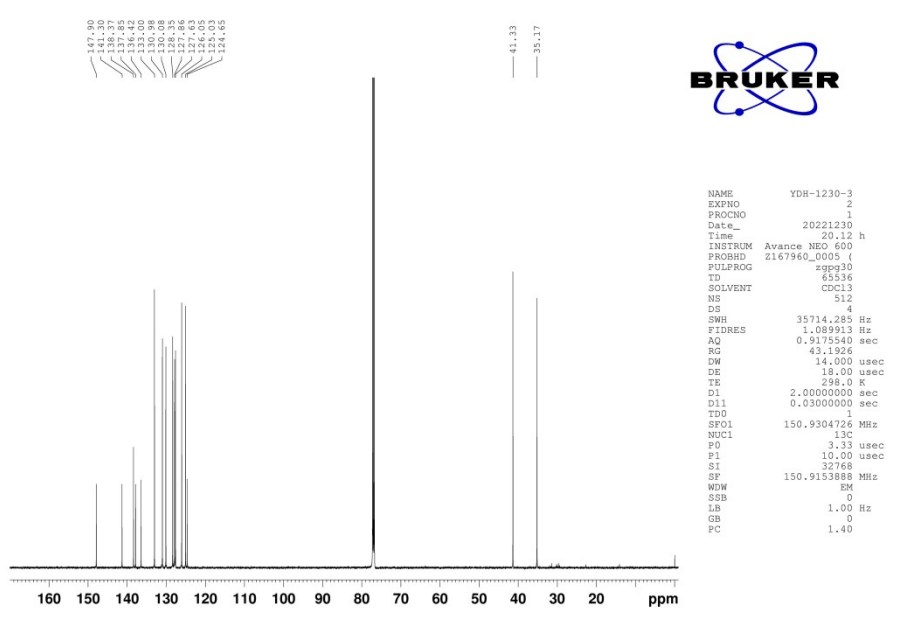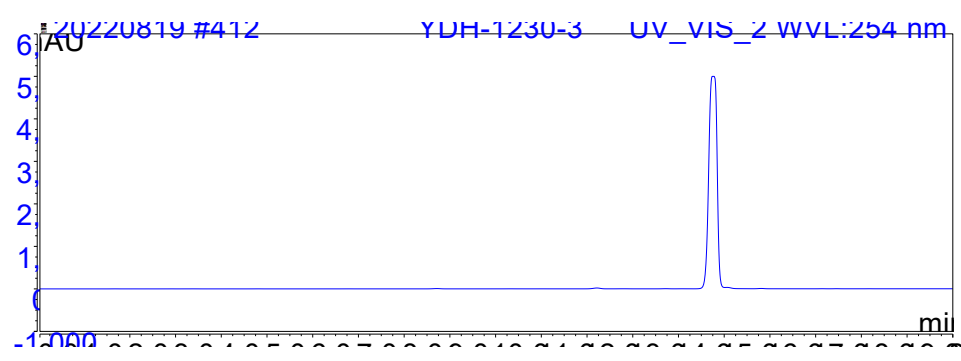

Figure S11. <sup>1</sup>H-NMR, <sup>13</sup>C-NMR and HPLC spectrum of compound 5k

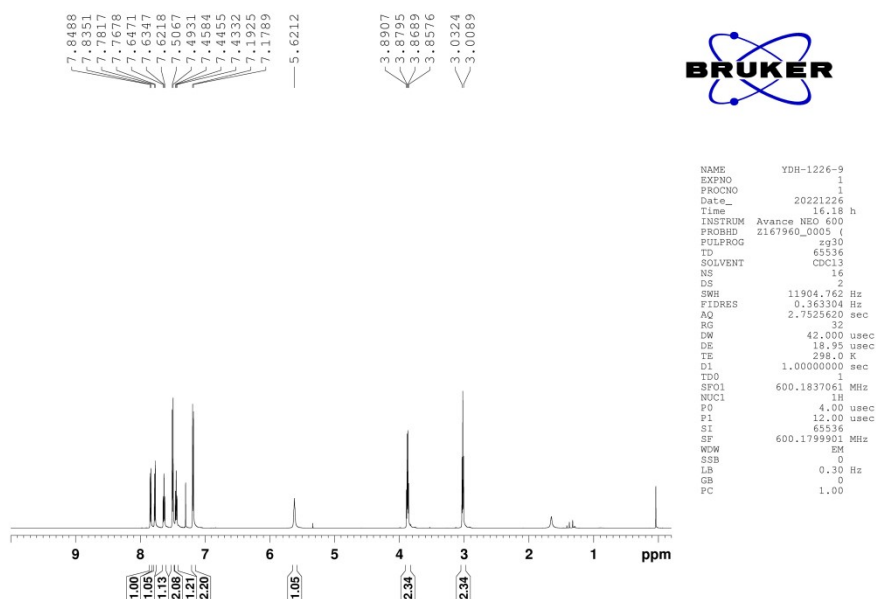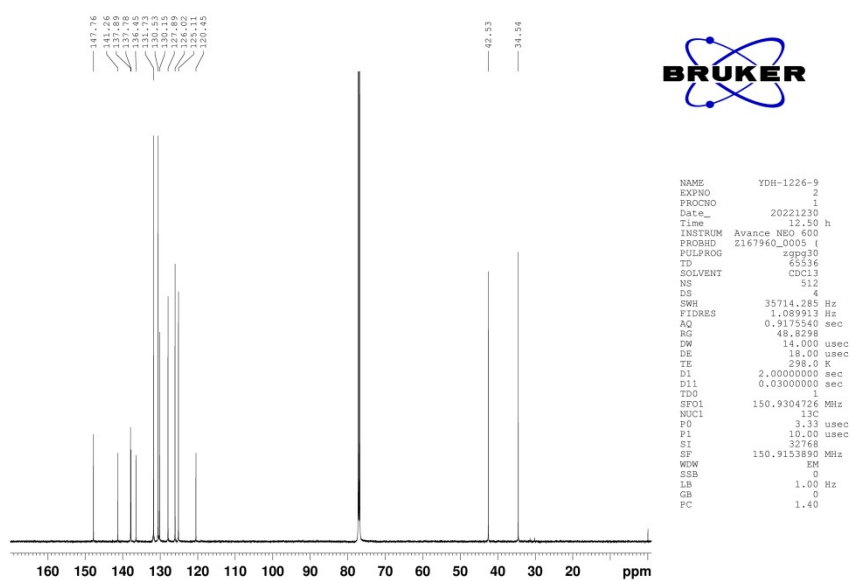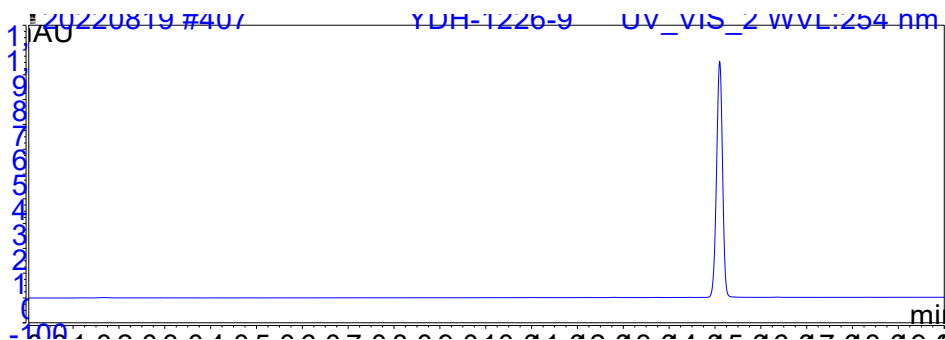

Figure S12. <sup>1</sup>H-NMR, <sup>13</sup>C-NMR and HPLC spectrum of compound 51

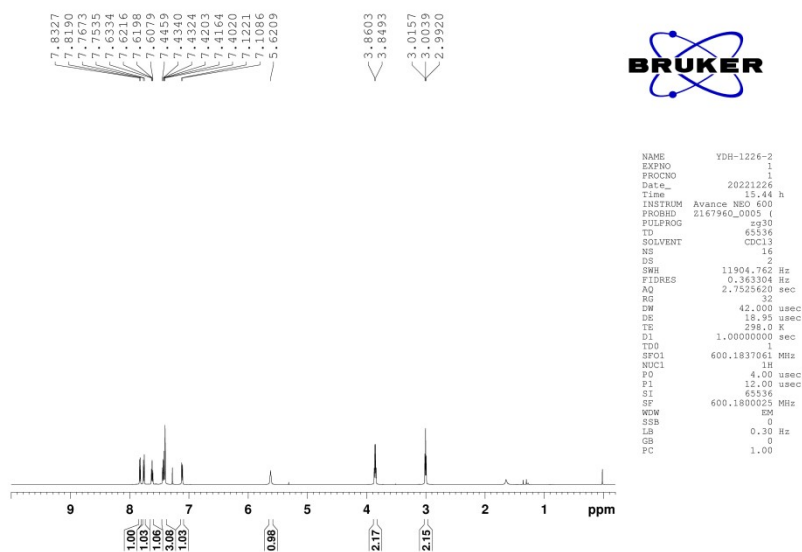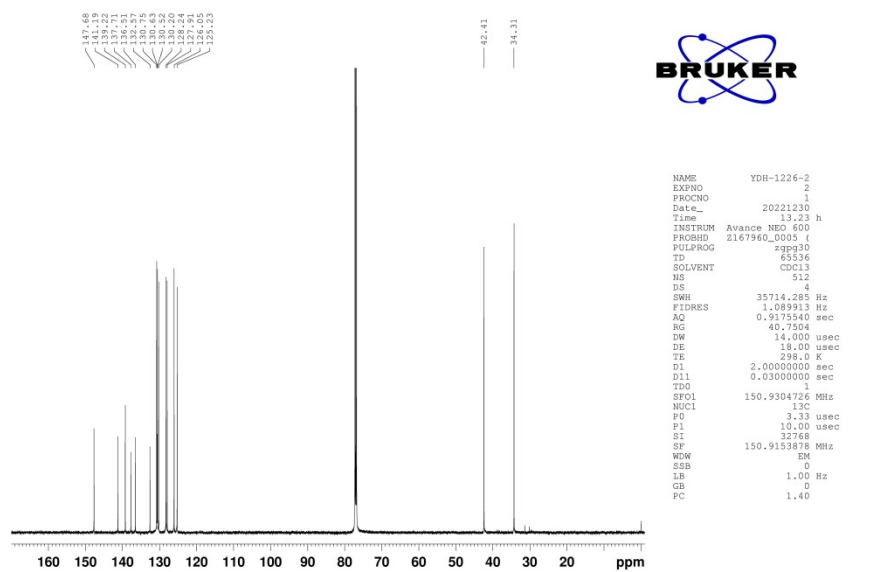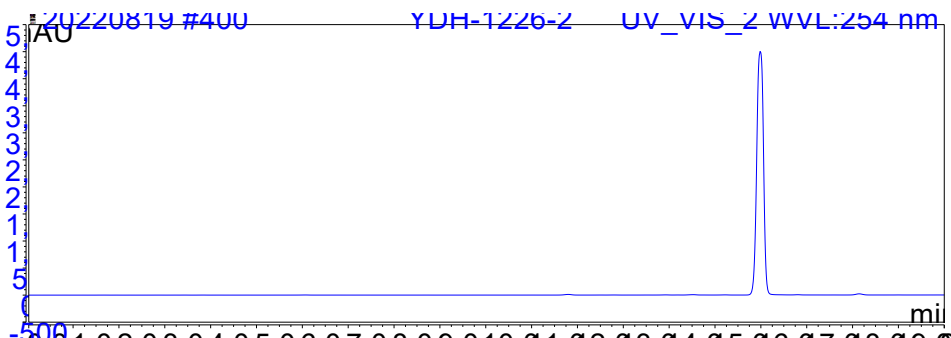

Figure S13. <sup>1</sup>H-NMR, <sup>13</sup>C-NMR and HPLC spectrum of compound 5m

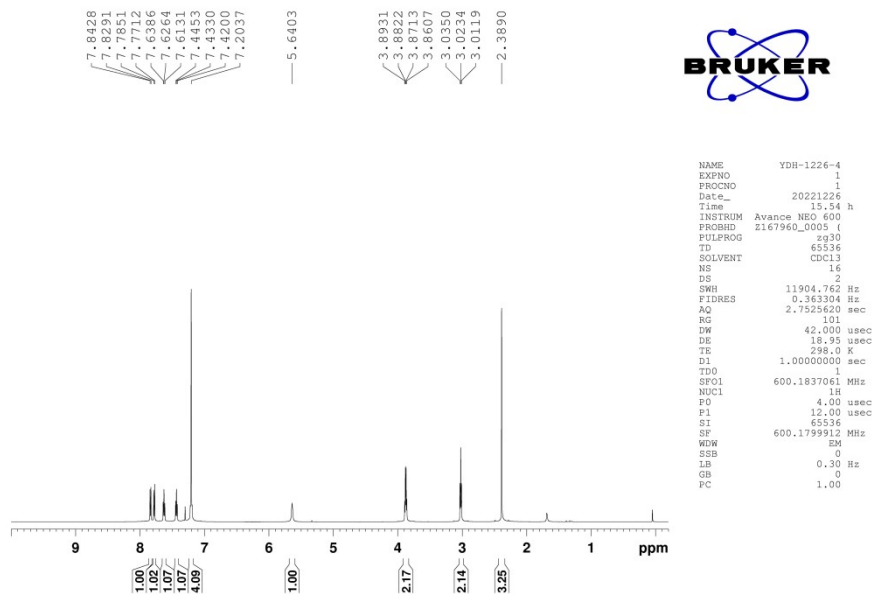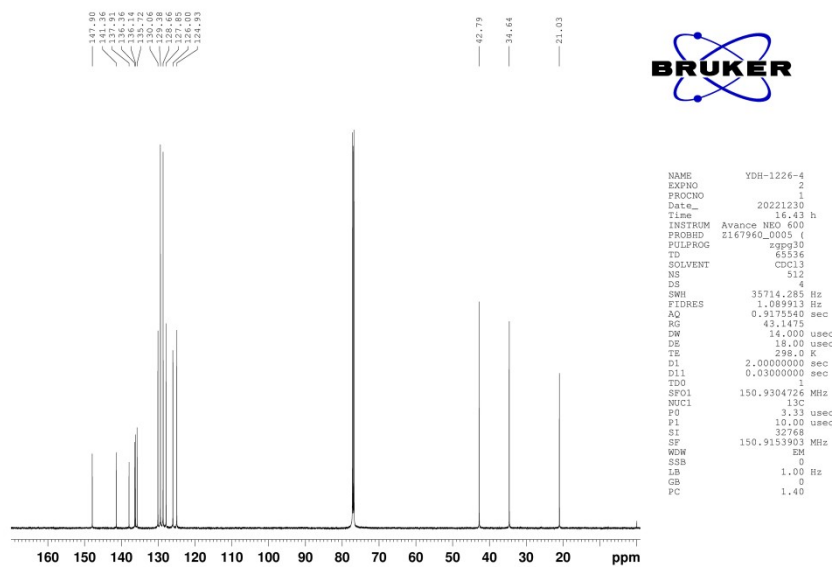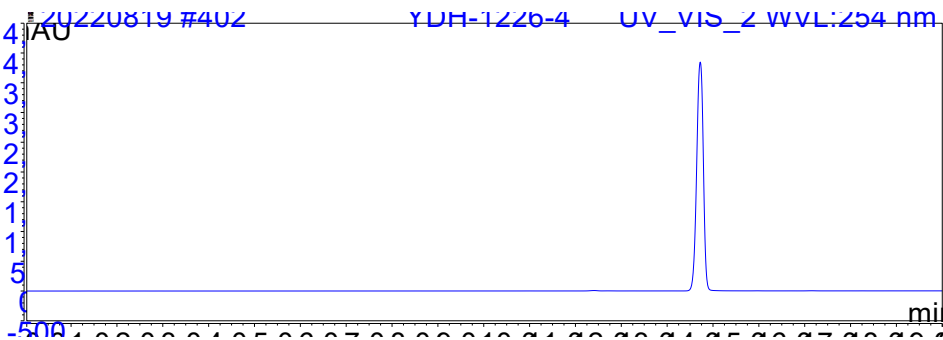

Figure S14. <sup>1</sup>H-NMR, <sup>13</sup>C-NMR and HPLC spectrum of compound 5n

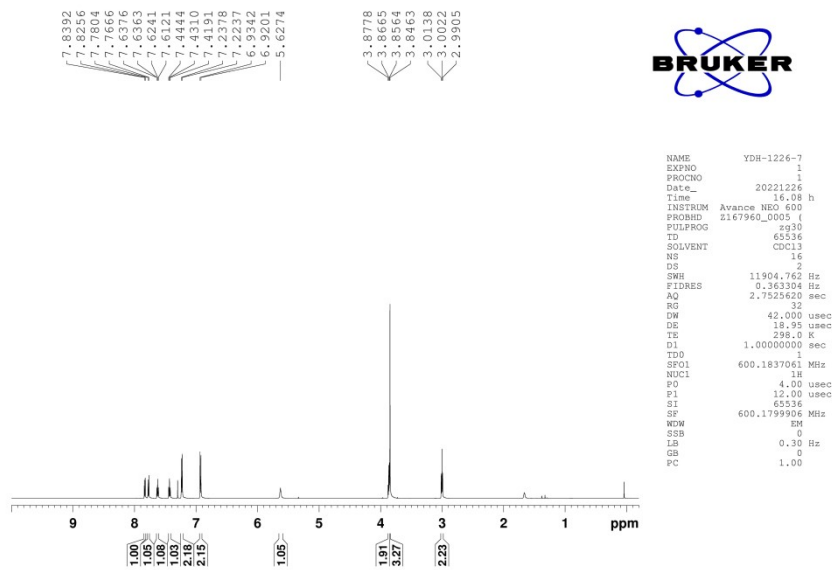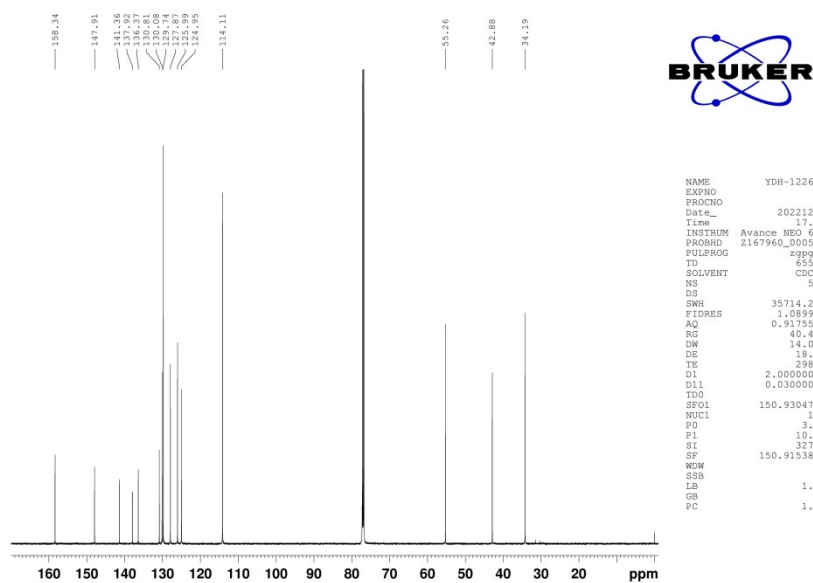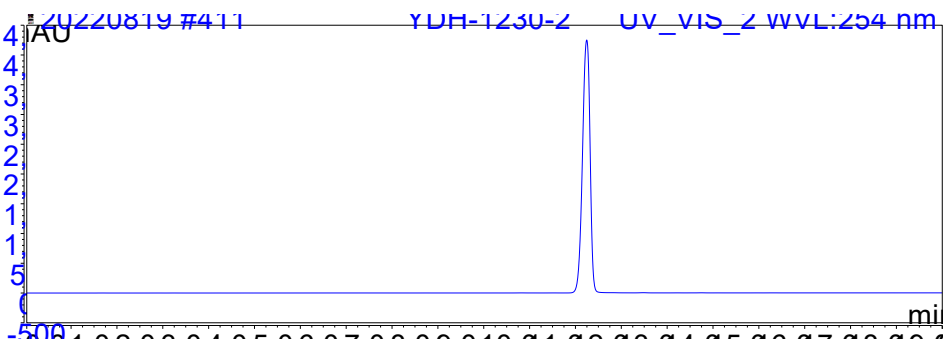

Figure S15. <sup>1</sup>H-NMR, <sup>13</sup>C-NMR and HPLC spectrum of compound 50

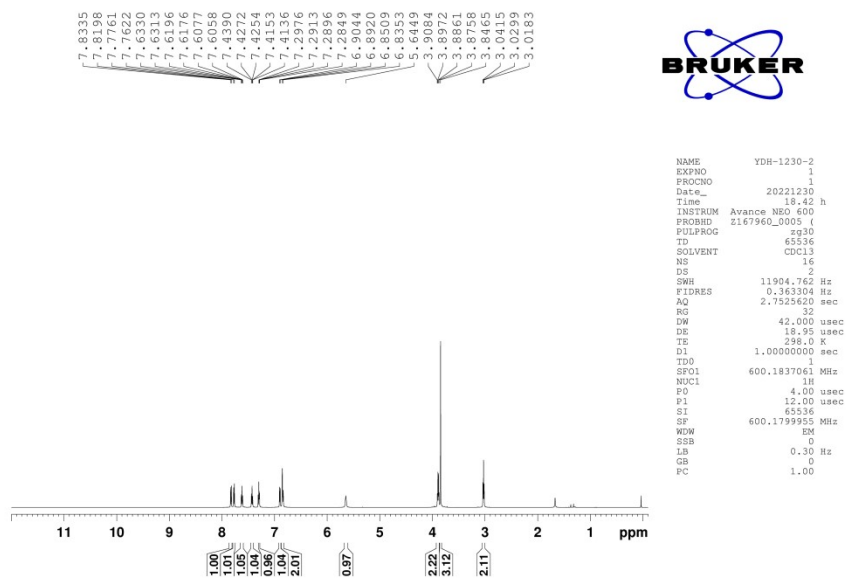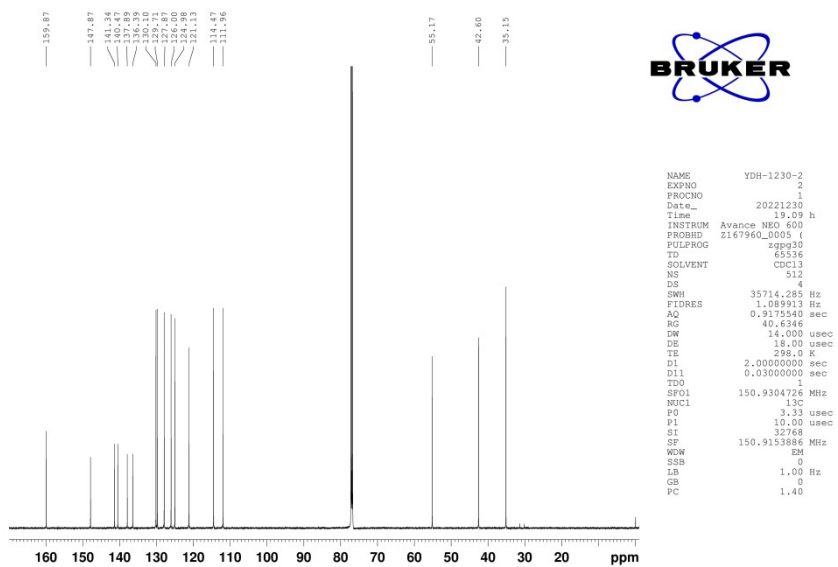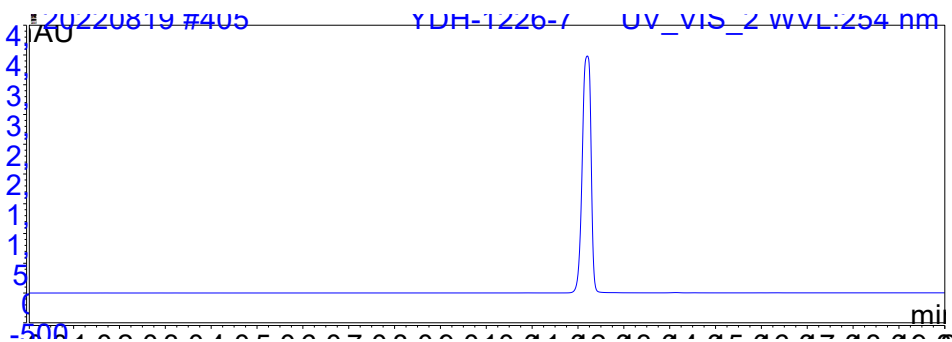

Figure S16. <sup>1</sup>H-NMR, <sup>13</sup>C-NMR and HPLC spectrum of compound 5p

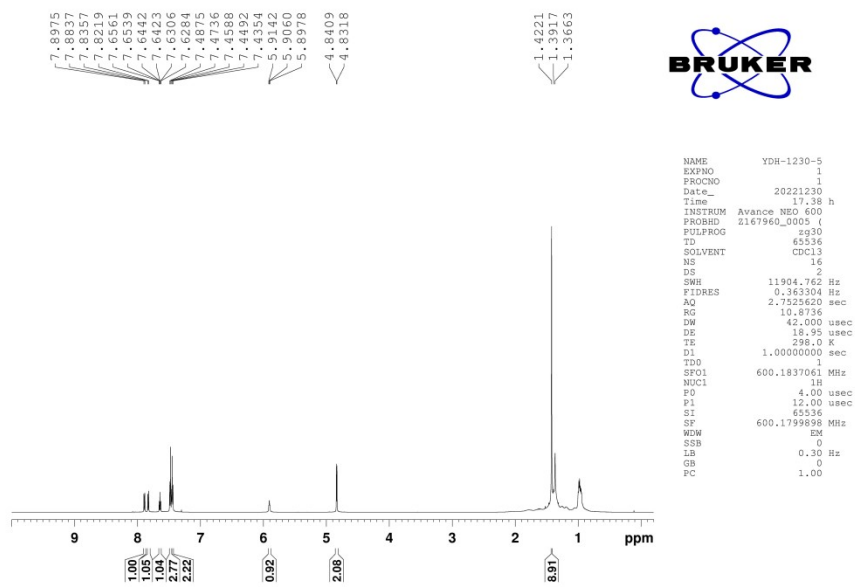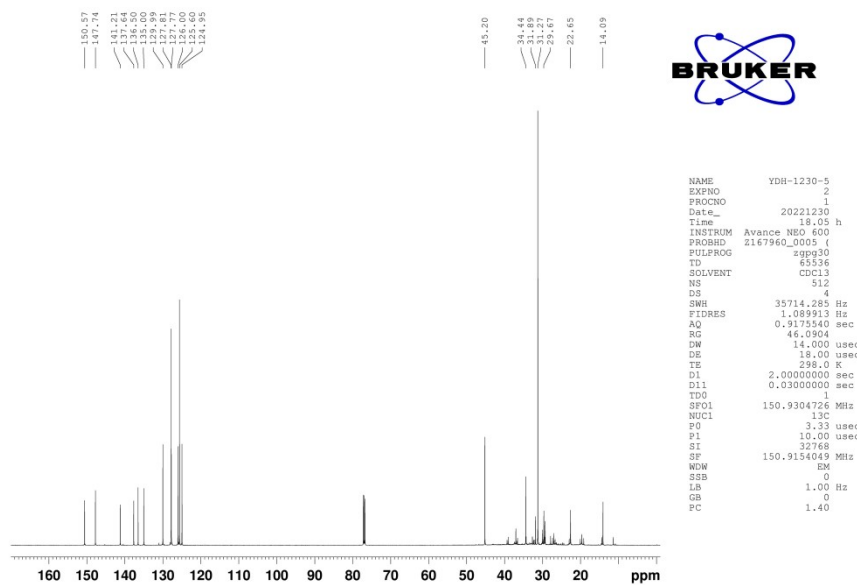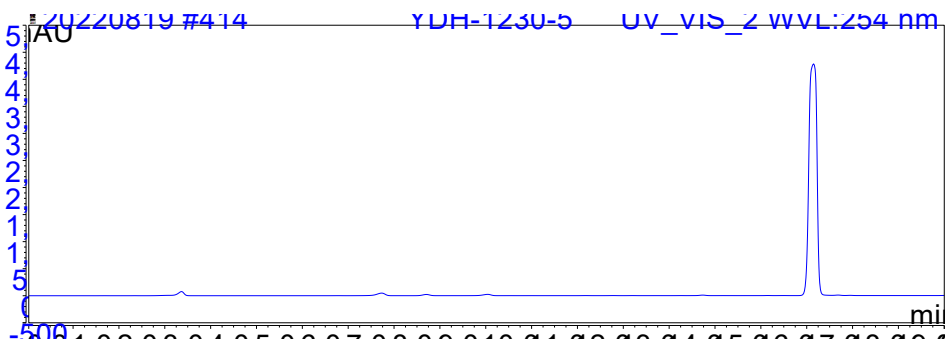

Supplement: MD-OLF-D4MD00670D-s001.pdf [file MD-OLF-D4MD00670D-s001.pdf]
